# Supplementary material
Source: PubMed Central journal article supplement (PMC3673029)

**Supplementary Figure 1. Comparing the signal to noise ratios of DDA to MRM experiments with one, two and three transitions.** The first two peaks are glycopeptides, while the third peak is a peptide. The increase in the S/N of the glycopeptides is 32-36 folds when using three transitions relative to one transition. This increase 6-8 folds when two transitions is used. However the increase in S/N for peptide is substantially lower (only 3 and 14-folds for 2-transitions and 3-transitions, respectively).

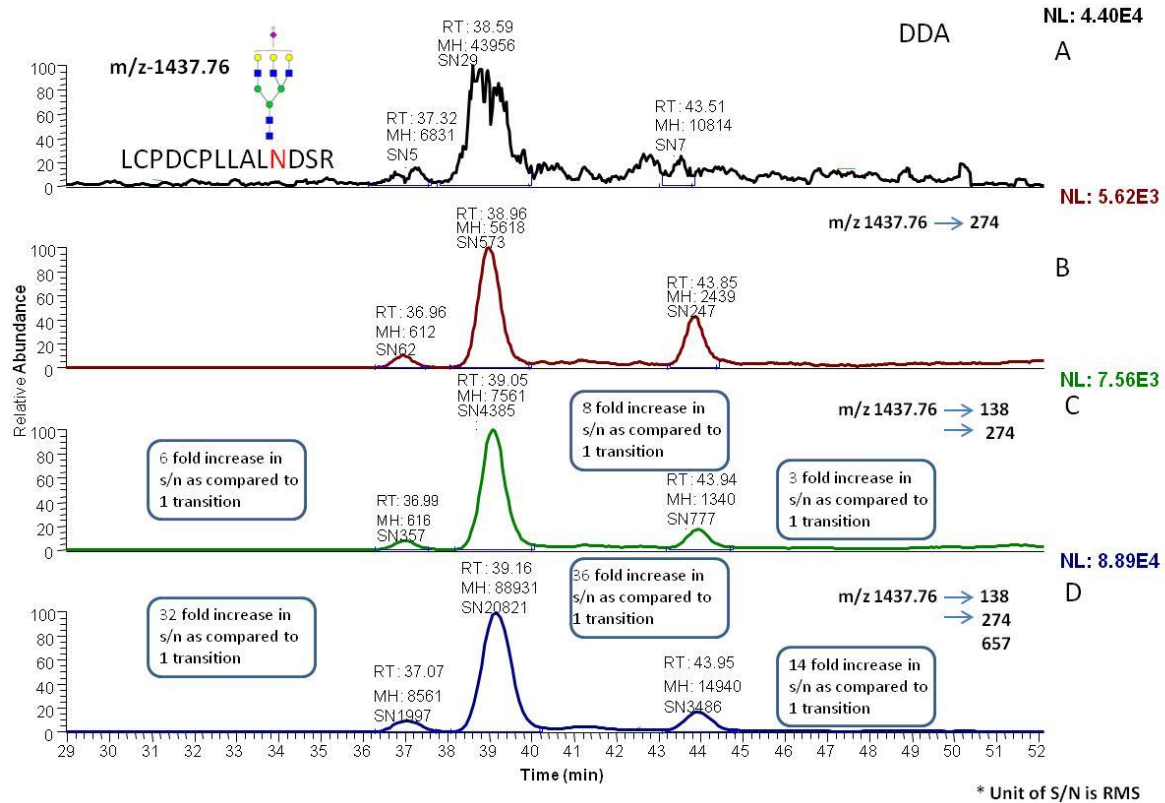

**Supplementary Figure 2. Linear concentration dynamic ranges of representative fetuin glycopeptides.** The ranges of these glycopeptides extend from 1.4fmol to 2.7nmol using oxonium ions,  $m/z$  138, 274, and 657, as transitions for the MRM experiments. Insets are representing 1.4fmol to 27.8fmol range.

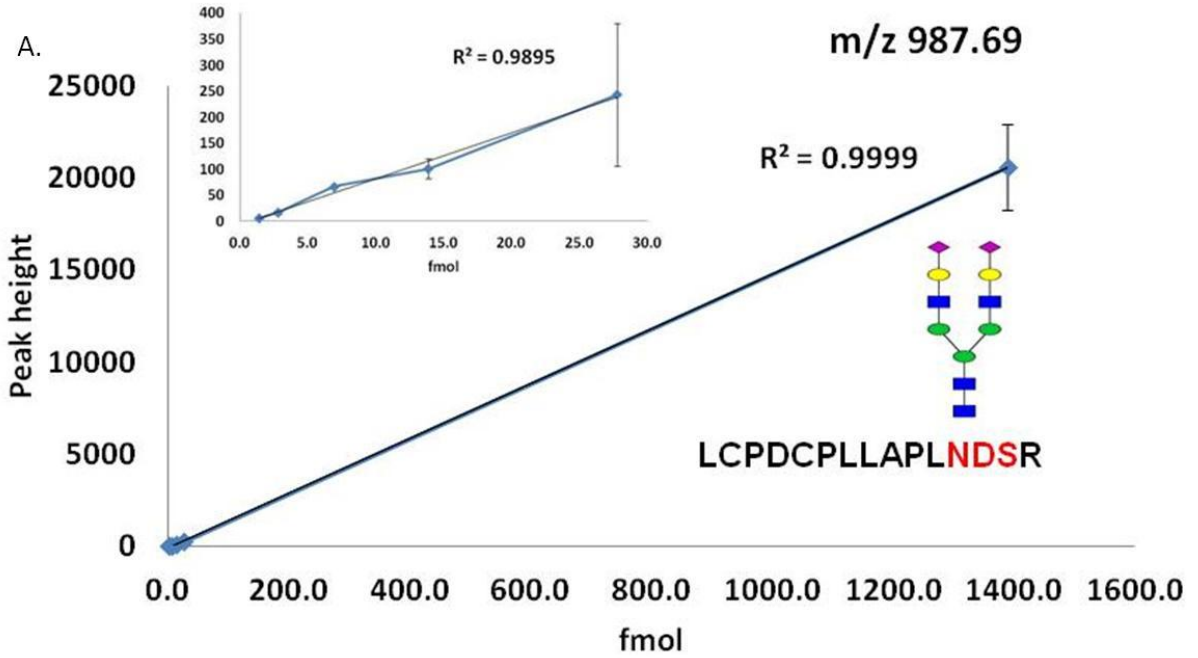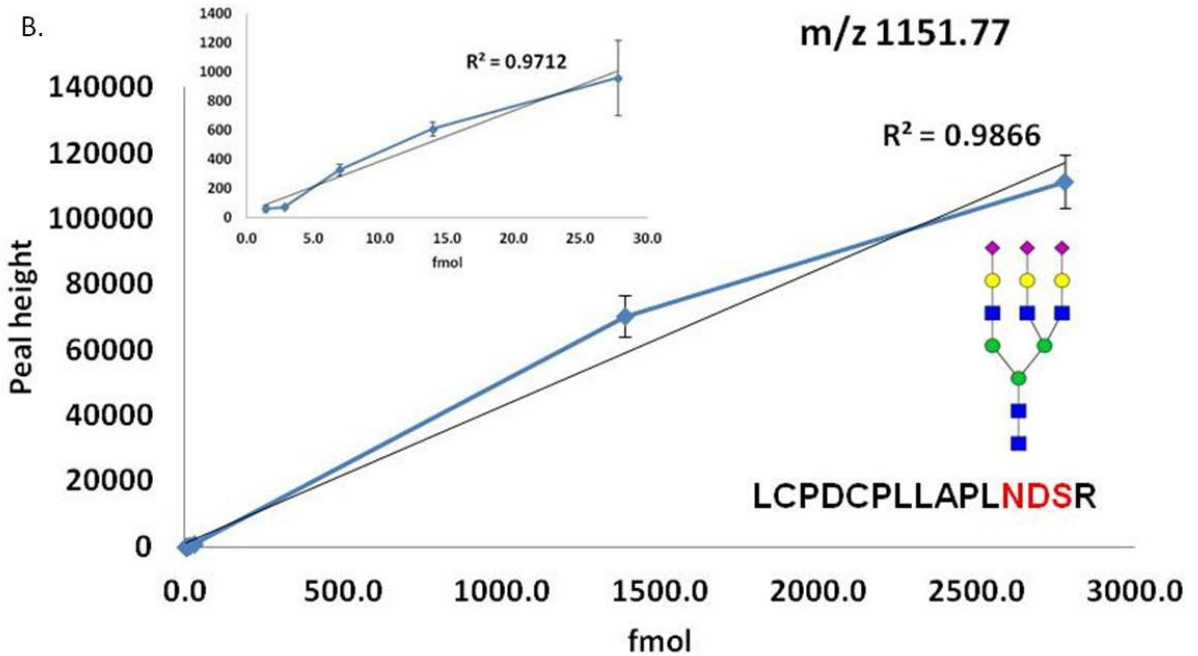

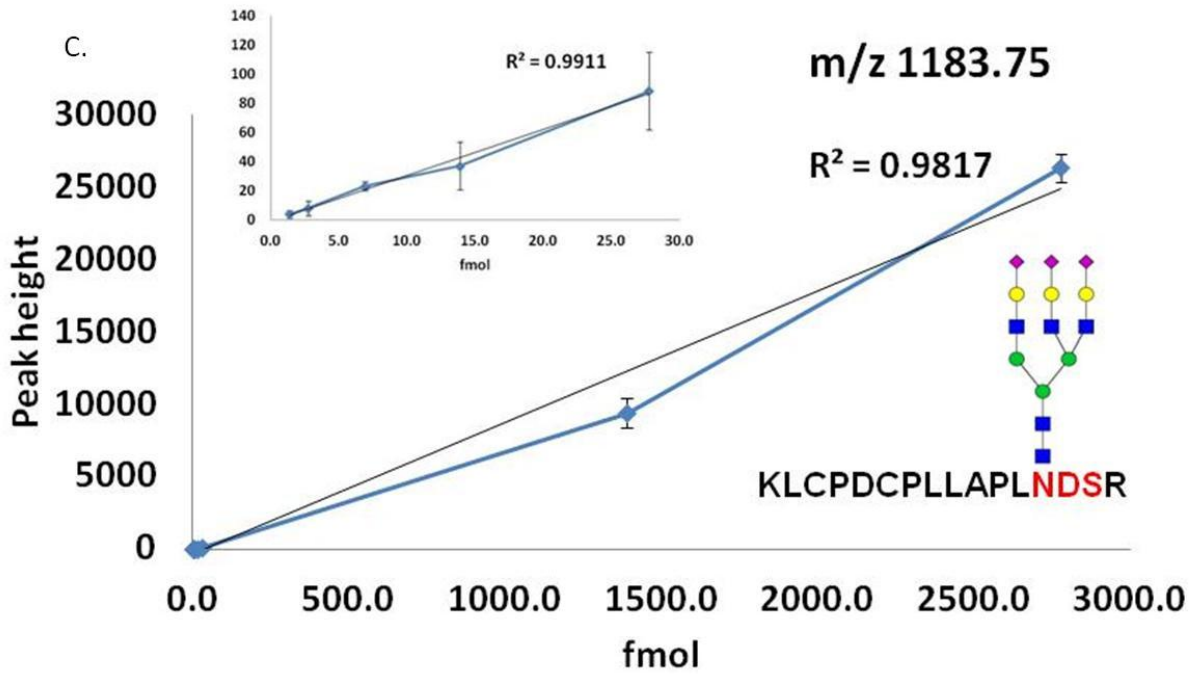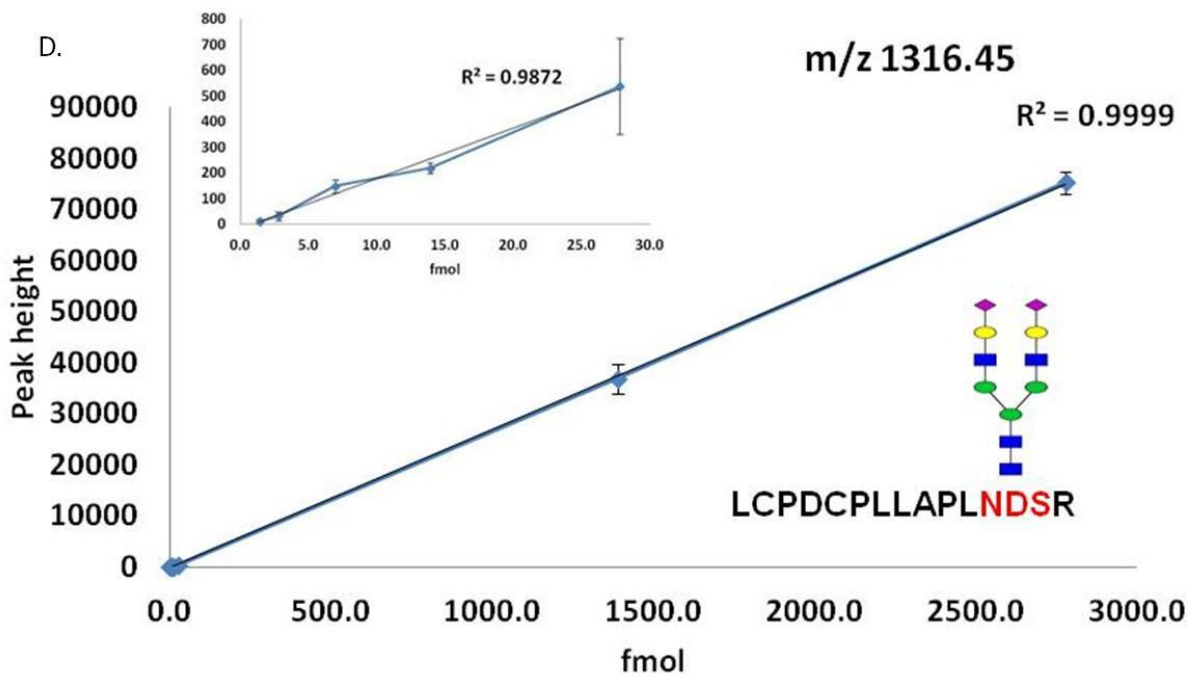

Supplement: NIHMS467963-supplement-Supplemnetary_Figures.pdf [file NIHMS467963-supplement-Supplemnetary_Figures.pdf]
